# Supplementary material for: Systematic review and meta-analysis of the prognostic significance of microRNAs in cervical cancer
Source: PubMed Central journal article supplement (PMC5908312; doi:10.18632/oncotarget.23839), 2017-12-16
Supplement: oncotarget-09-17141-s001.pdf [file oncotarget-09-17141-s001.pdf]

## Systematic review and meta-analysis of the prognostic significance of microRNAs in cervical cancer

### SUPPLEMENTARY MATERIALS

**Supplementary Table 1: Results of analysis with NOS for included studies**

| Author (Year)           | Selection |   |   | Comparability |   |   | Outcome |   |   | Total score |
|-------------------------|-----------|---|---|---------------|---|---|---------|---|---|-------------|
|                         | a         | b | c | d             | e | f | g       | h | i |             |
| S. Azizmohammadi (2016) | 1         | 1 | 1 | 1             | 1 | 0 | 1       | 1 | 0 | 7           |
| Fan (2015)              | 1         | 1 | 1 | 1             | 1 | 1 | 1       | 1 | 0 | 8           |
| Wang (2015)             | 1         | 1 | 1 | 1             | 1 | 1 | 1       | 1 | 1 | 9           |
| Liu (2015)              | 1         | 1 | 1 | 1             | 1 | 1 | 1       | 1 | 0 | 8           |
| Hou (2013)              | 1         | 1 | 1 | 1             | 1 | 0 | 1       | 1 | 1 | 8           |
| Huang (2012)            | 1         | 1 | 1 | 1             | 1 | 1 | 1       | 1 | 1 | 9           |
| Huang (2012)            | 1         | 1 | 1 | 1             | 1 | 1 | 1       | 1 | 1 | 9           |

a = Adequate definition of the case (1 star); b = Representativeness of the cases (1 star); c = Selection of Controls; d = Definition of Controls (1 star); e = Study controls for age (1 star); f = Study controls for any additional factor (1 star); g = Ascertainment of exposure; h = Same method of ascertainment for cases and controls; i = Non-Response rate(1 star).
